# Supplementary material
Source: publisher figshare collection journal article supplement (https://tandf.figshare.com/articles/dataset/_/28334945)
Supplement: Supplementary file 1 [file 1]

**Appendix 1: Survey Content**

### **How old are you?**

My age is

|  |
| --- |

### **What is your gender?**

|  | Male |
| --- | --- |
|  | Female |
|  | Prefer not to say |
|  | Other |

Other please specify

|  |
| --- |

### **What is your race/ethnicity?**

| **White** | |
| --- | --- |
|  | British |
|  | Irish |
|  | Other |
| **Asian or Asian British** | |
|  | Indian |
|  | Pakistani |
|  | Bangladeshi |
|  | Any other Asian background |
| **Mixed** | |
|  | White and Black Caribbean |
|  | White and black African |
|  | White and Asian |
|  | Any other mixed background |
| **Black or Black British** | |
|  | Caribbean |
|  | African |
|  | Any other black background |
| **Other Ethnic Group** | |
|  | Chinese |
|  | Any other Ethnic Group |
|  | I do not wish to disclose my ethnic origin |

### **What is your tenure?**

|  | I am renting and this is my first rented home |
| --- | --- |
|  | I am renting and I have rented before |
|  | I own this house and it is the first house I have owned |
|  | I own this house and I have previously owned another house |

### **How long have you lived in your current home?**

|  | 0-1 year |
| --- | --- |
|  | 1-2 years |
|  | 2+ years |

### **Which of the following best applies to you and your current home?**

|  | I have access to a private garden |
| --- | --- |
|  | I have access to a shared/communal garden |
|  | I have access to a private outdoor space but not a garden (balcony, yard, patio area) |
|  | I don’t have access to a garden, private outdoor space, or shared/communal garden |
|  | Don’t know |
|  | Prefer not to say |

### **Please indicate which (if any) of the following things are present in your garden/outdoor space (select all that apply)**

|  | Bird feeder/table |
| --- | --- |
|  | Bird bath |
|  | Bird nest box |
|  | Other nest box (e.g. bat, hedgehog, bumblebee, bug hotel) |
|  | Pond |
|  | Compost heap/leaf pile |
|  | Log pile |
|  | Wild/undisturbed area (e.g. long grass, brambles) |
|  | Plants with berries/fruits |
|  | Flowering plants |
|  | Hedge/shrubs |
|  | Trees taller than 2 m |

### **Which of the following activities have you done, would you consider doing or wouldn't you do in your garden/outdoor space?**

|  | Have done | Would consider | Wouldn't do | Don't know |
| --- | --- | --- | --- | --- |
| Plant / maintain pollinator-friendly plants |  |  |  |  |
| Create log piles or other materials that can be used as a home or shelter by wildlife |  |  |  |  |
| Maintain plants with berries/fruits |  |  |  |  |
| Provide supplementary food for wild animals such as birds (e.g. bird food) |  |  |  |  |
| Provide water for animals (e.g. bird bath, pond) |  |  |  |  |
| Create a compost pile |  |  |  |  |
| Use pesticides |  |  |  |  |
| Leave parts of my lawn unmown to grow longer |  |  |  |  |
| Watch for wildlife in my garden |  |  |  |  |
| Grow fruit and/or vegetables |  |  |  |  |

### **For each of the following, please rate the extent to which you agree with each statement, using the scale shown below. Please respond as you really feel, rather than how you think "most people" feel.**

|  | Strongly agree | Agree | Neither agree nor disagree | Disagree | Strongly disagree |
| --- | --- | --- | --- | --- | --- |
| My ideal vacation spot would be a remote, wilderness area |  |  |  |  |  |
| I always think about how my actions affect the environment |  |  |  |  |  |
| My connection to nature and the environment is a part of my spirituality |  |  |  |  |  |
| I take notice of wildlife wherever I am |  |  |  |  |  |
| My relationship to nature is an important part of who I am |  |  |  |  |  |
| I feel very connected to all living things and the earth |  |  |  |  |  |

### **Thinking about your garden/outdoor space or local green space, to what extent do you agree or disagree with the following statements?**

|  | Strongly agree | Agree | Neither agree nor disagree | Disagree | Strongly disagree |
| --- | --- | --- | --- | --- | --- |
| I like spending time in my garden/outdoor space |  |  |  |  |  |
| I like to grow fruit, vegetables, and or herbs in my garden/outdoor space |  |  |  |  |  |
| My garden/outdoor space is a place for children to play |  |  |  |  |  |
| I enjoy the privacy of my garden/outdoor space |  |  |  |  |  |
| I encourage wildlife into my garden/outdoor space (e.g. feeding birds) |  |  |  |  |  |
| I enjoy seeing wildlife in my garden/outdoor space |  |  |  |  |  |
| I enjoy looking at trees/grass/plants in my garden/outdoor space |  |  |  |  |  |
| My garden/outdoor space is an extension of my home |  |  |  |  |  |
| I talk about my garden/outdoor space with family/friends/neighbours |  |  |  |  |  |
| My garden/outdoor space is a place to socialise with others |  |  |  |  |  |
| I am influenced by what my neighbours have done in their gardens/outdoor spaces |  |  |  |  |  |
| My garden/outdoor space is a place to share with nature |  |  |  |  |  |
| Being in my garden/outdoor space helps me to relax |  |  |  |  |  |
| My garden/outdoor space helps me connect to nature |  |  |  |  |  |
| I want to help nature in my garden/outdoor space |  |  |  |  |  |

### **How important are the following reasons to you for using your garden/outdoor space/local green space?**

|  | Extremely important | Very important | Somewhat important | Not so important | Not at all important |
| --- | --- | --- | --- | --- | --- |
| Enjoyment of plants/ﬂowers |  |  |  |  |  |
| Keeping ﬁt |  |  |  |  |  |
| Relaxation |  |  |  |  |  |
| Recreation (e.g. for children, pets, games) |  |  |  |  |  |
| Entertainment and outside dining (e.g. barbeques) |  |  |  |  |  |
| Growing food |  |  |  |  |  |
| Watching/attracting wildlife |  |  |  |  |  |

### **In terms of factors that might make you less likely to do things to help wildlife in your garden/outdoor space/local green space, how important are the following?**

|  | Extremely important | Very important | Somewhat important | Not so important | Not at all important |
| --- | --- | --- | --- | --- | --- |
| The time it takes |  |  |  |  |  |
| The size of my garden/outdoor space |  |  |  |  |  |
| The cost of doing things |  |  |  |  |  |
| A lack of knowledge/information about what to do |  |  |  |  |  |
| A lack of practical skills to do it |  |  |  |  |  |
| The condition of green spaces surrounding my home |  |  |  |  |  |
| Neighbourhood standards/social pressures |  |  |  |  |  |
| Not being able to see wildlife near my home |  |  |  |  |  |
| The number of neighbourhood cats |  |  |  |  |  |
| Having nothing in my garden/outdoor space when I moved in |  |  |  |  |  |

### **How important are the following sources of information/inspiration to you for helping decide what to do in your garden/outdoor space/local green space?**

|  | Extremely important | Very important | Somewhat important | Not so important | Not at all important |
| --- | --- | --- | --- | --- | --- |
| Personal advice (e.g. friends, relatives, neighbours) |  |  |  |  |  |
| Books and media (e.g. magazines, TV, internet websites) |  |  |  |  |  |
| Social Media |  |  |  |  |  |
| How local surrounding green spaces are designed |  |  |  |  |  |
| Local events (e.g. stalls at community fun days) |  |  |  |  |  |
| Expert talks/meetings at gardening clubs or associations |  |  |  |  |  |
| Demonstration gardens (e.g. at ﬂower shows/other developments or online examples) |  |  |  |  |  |

### **Thinking about your garden/outdoor space/local green space, how helpful would the following things be in terms of supporting you to do more for wildlife?**

|  | Extremely helpful | Very helpful | Somewhat helpful | Not very helpful | Not at all helpful |
| --- | --- | --- | --- | --- | --- |
| Clear examples of what things help wildlife |  |  |  |  |  |
| Practical guidance about how to do things in my garden |  |  |  |  |  |
| Access to show gardens demonstrating what your own garden/outdoor space could look like |  |  |  |  |  |
| A local community gardening/wildlife gardening group |  |  |  |  |  |
| Shared information about local wildlife on a social forum, e.g. neighbourhood Facebook page |  |  |  |  |  |
| Seeing wildlife in your neighbourhood |  |  |  |  |  |
| Surrounding green spaces that are managed in a wildlife-friendly way |  |  |  |  |  |
| Knowing what kinds of wildlife live in your area |  |  |  |  |  |
| Knowing that your neighbours were doing similar things |  |  |  |  |  |
